# Supplementary material
Source: ML conference proceedings conference paper supplement (https://openaccess.thecvf.com/content/CVPR2022/html/Yuan_NeRF-Editing_Geometry_Editing_CVPR_2022_paper.html)
Supplement: Supplementary file 2 [file Yuan_NeRF-Editing_Geometry_Editing_CVPR_2022_supplemental.zip]

Archive with 2 entries (2 files):
- 00030_supp_.pdf
- 00030_video.mp4
